# Supplementary material
Source: HighWire-hosted journal article supplement (http://dmd.aspetjournals.org/highwire/filestream/68394/field_highwire_adjunct_files/0/DMD72140_suppl_figures.pdf)
Supplement: DMD72140_suppl_figures.pdf [file DMD72140_suppl_figures.pdf]

Supplemental Data

**Extrapolation of elementary rate constants of P-glycoprotein mediated transport from MDCKII- hMDR1 to Caco-2 cells**

Z. Meng<sup>1,2</sup>, H. Ellens<sup>2</sup>, J. Bentz<sup>1\*</sup>

1 Drexel University, Department of Biology, Philadelphia, PA

2 GlaxoSmithKline Pharmaceuticals, Drug Metabolism and Pharmacokinetics, King of Prussia, PA

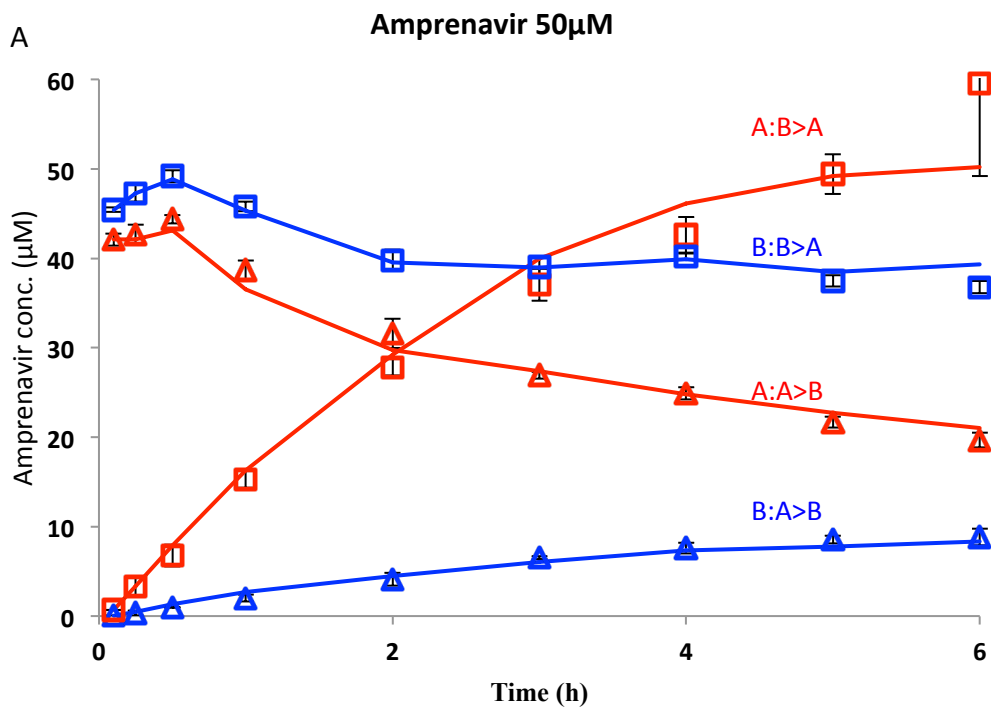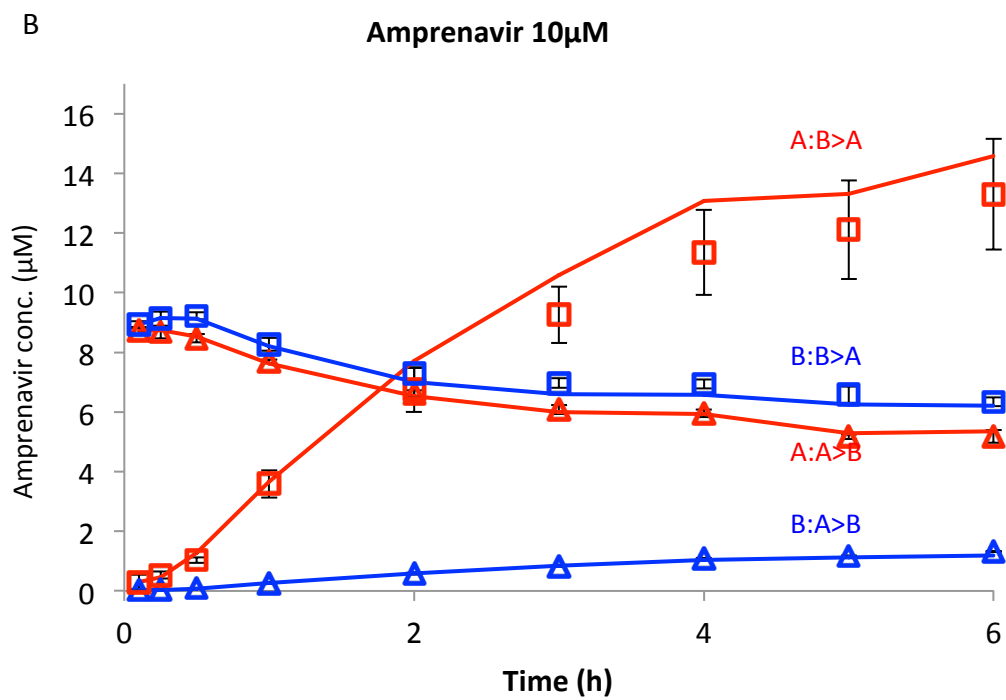

C

Amprenavir 5 $\mu$ M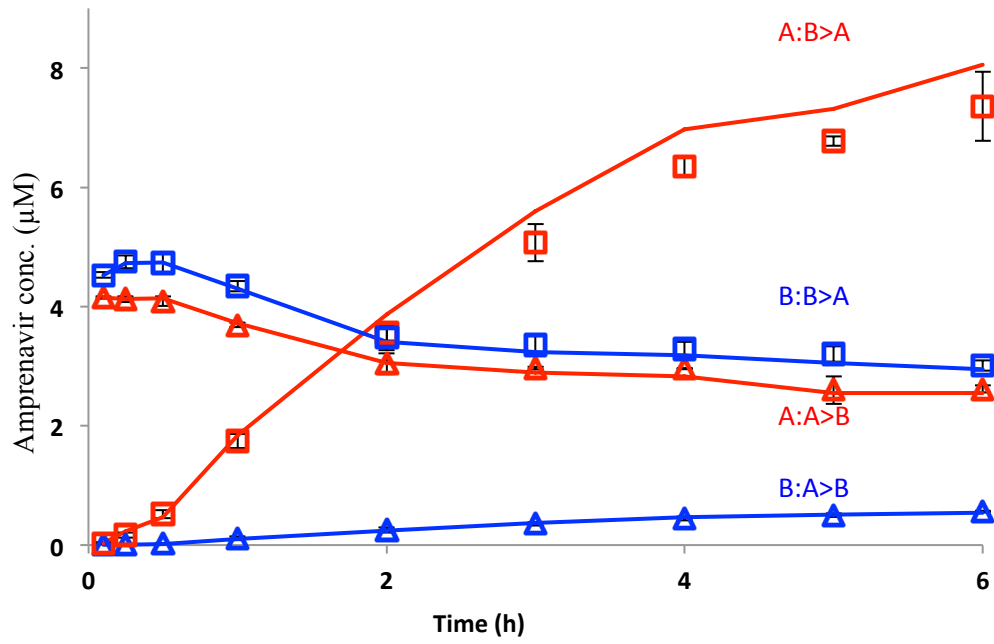

D

Amprenavir 2 $\mu$ M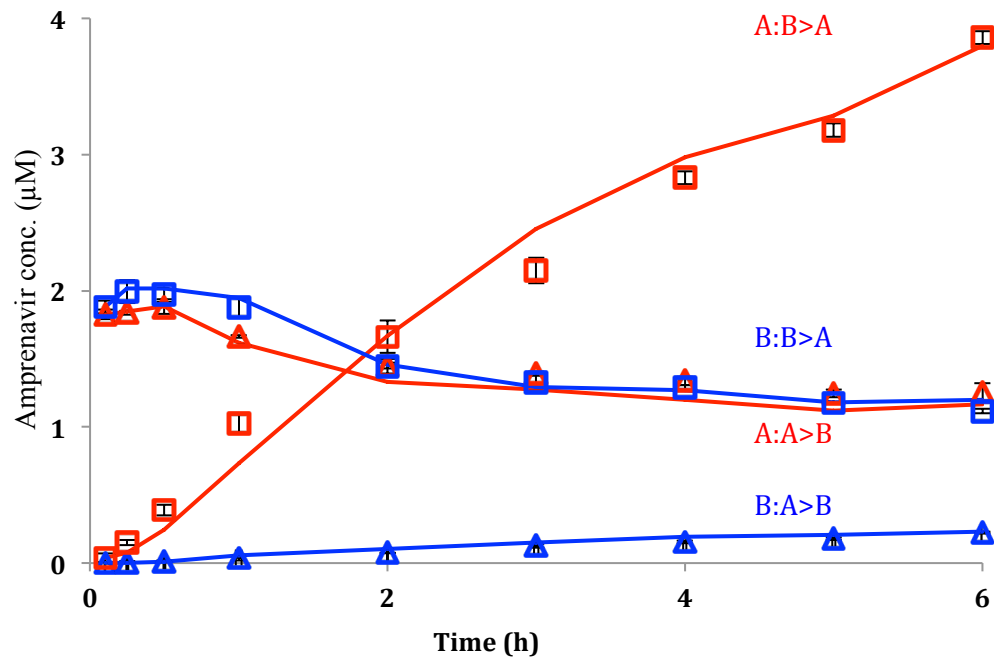

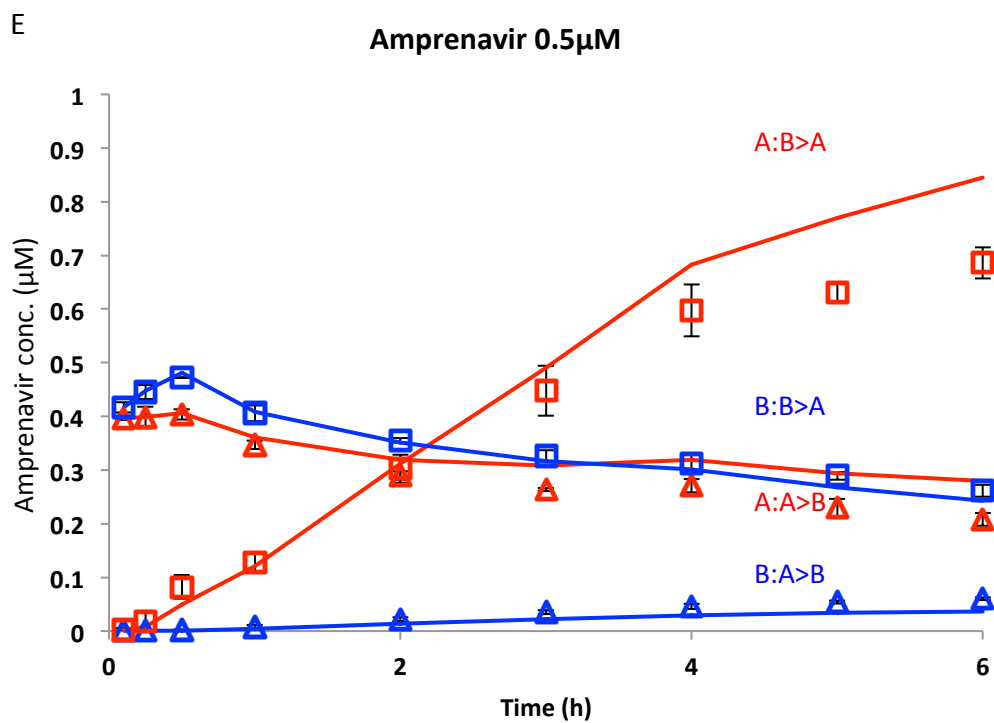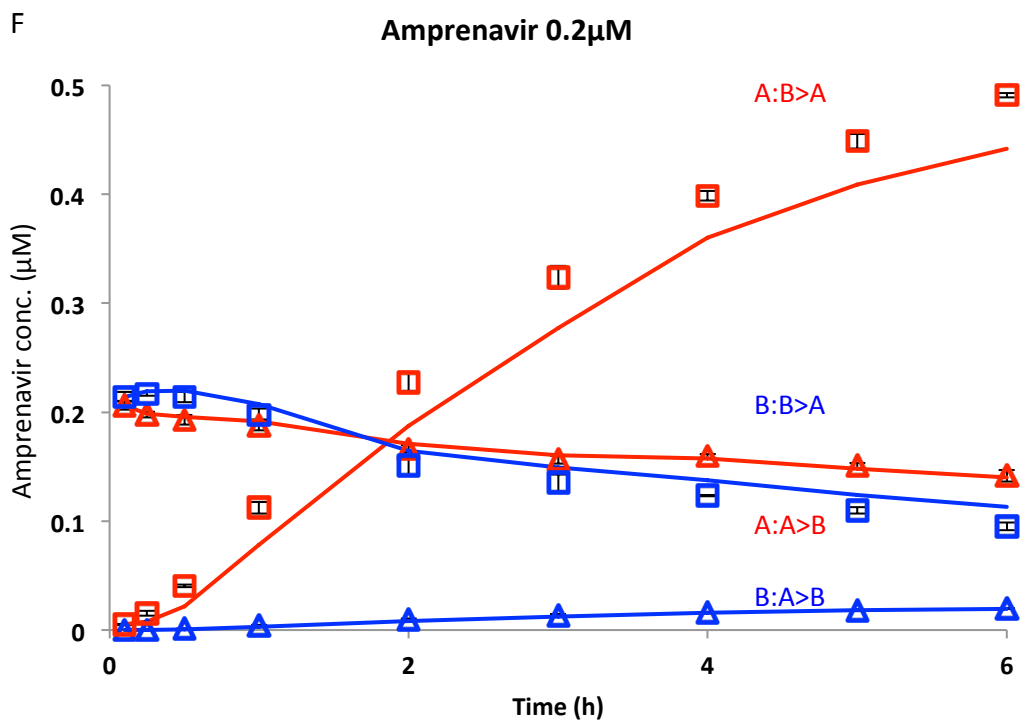

**Supplemental Figure 1:** Transport data of amprenavir with initial concentration of 50 $\mu$ M (A), 10 $\mu$ M (B), 5 $\mu$ M (C), 2 $\mu$ M (D), 0.5 $\mu$ M (E) and 0.2 $\mu$ M (F) over 6 hours and their fitted curves across Caco-2 cell monolayers. The symbols show the data points with error bars showing the standard deviation of triplicate experimental measurement. The lines show the best fits for drugs assuming there are no other transporters. A:B>A denotes the substrate concentration in the apical chamber when the basolateral chamber is the donor, while B:B>A denotes the substrate concentration remaining in the donor basolateral chamber. The A:B>A transport is high because P-gp actively effluxes drug into the apical chamber. The B:A>B denotes the substrate concentration in the basolateral chamber when apical chamber is the donor, while A:A>B denotes the substrate concentration remaining in the donor apical chamber.

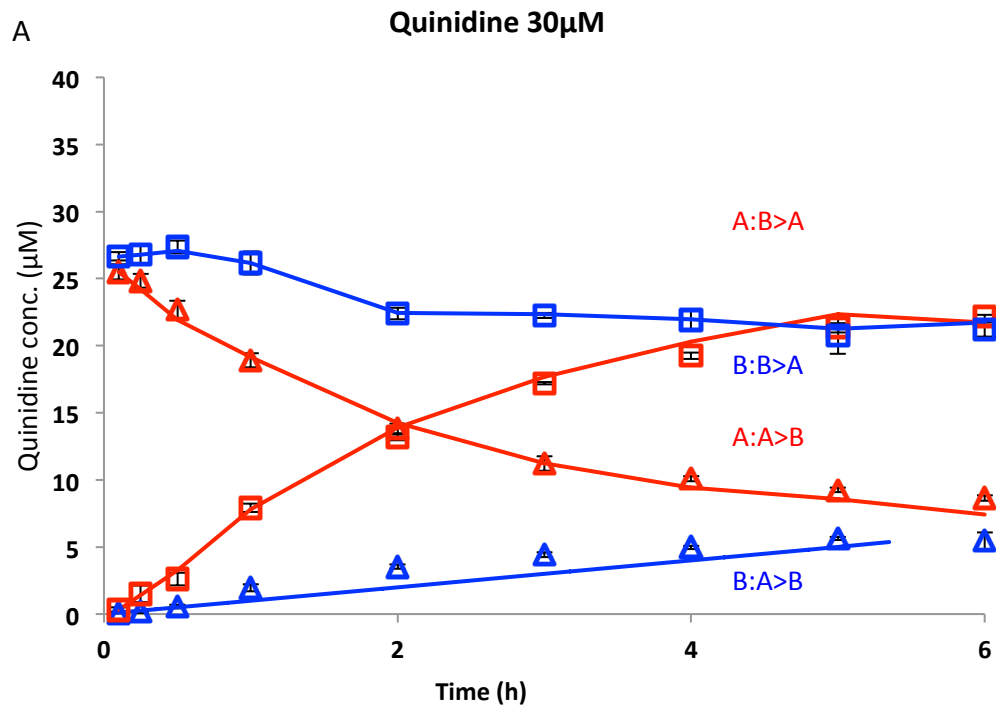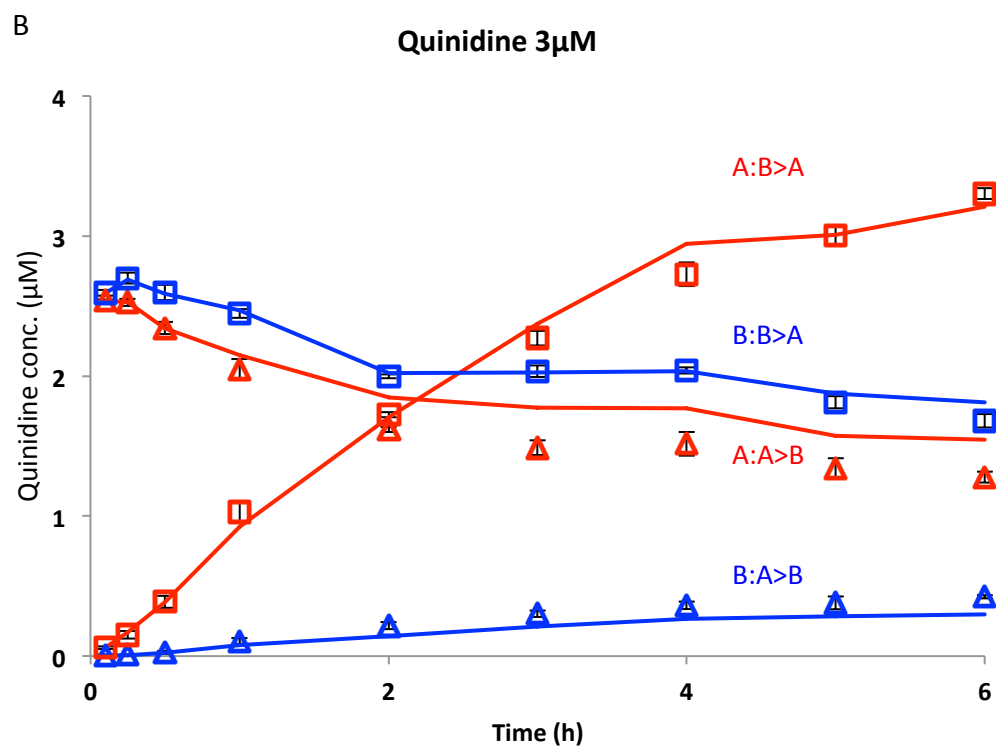

C

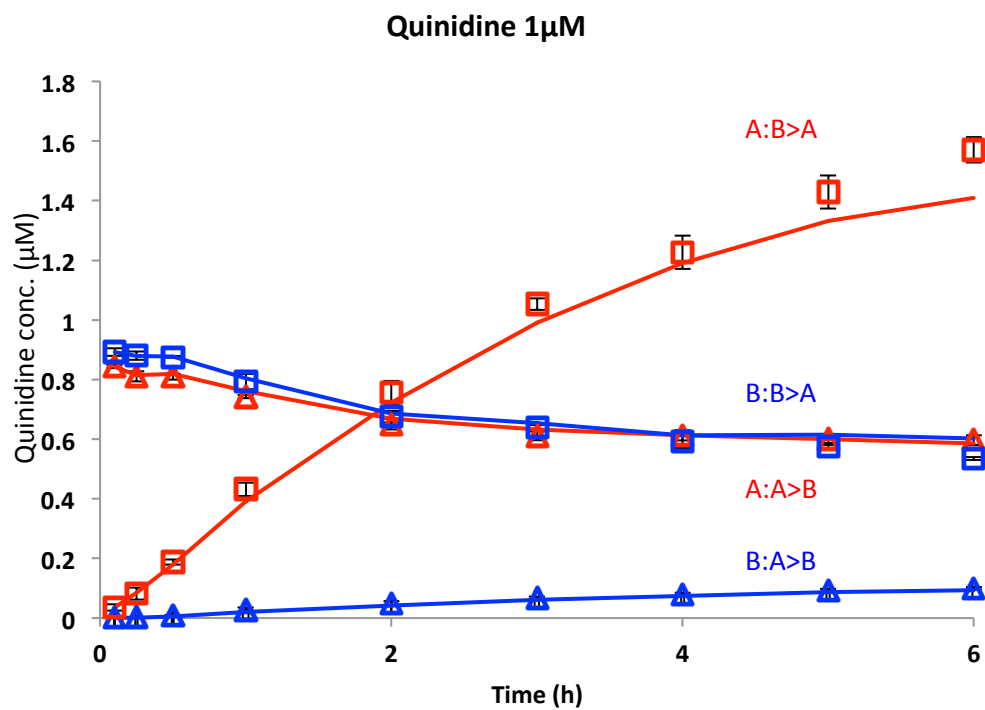

D

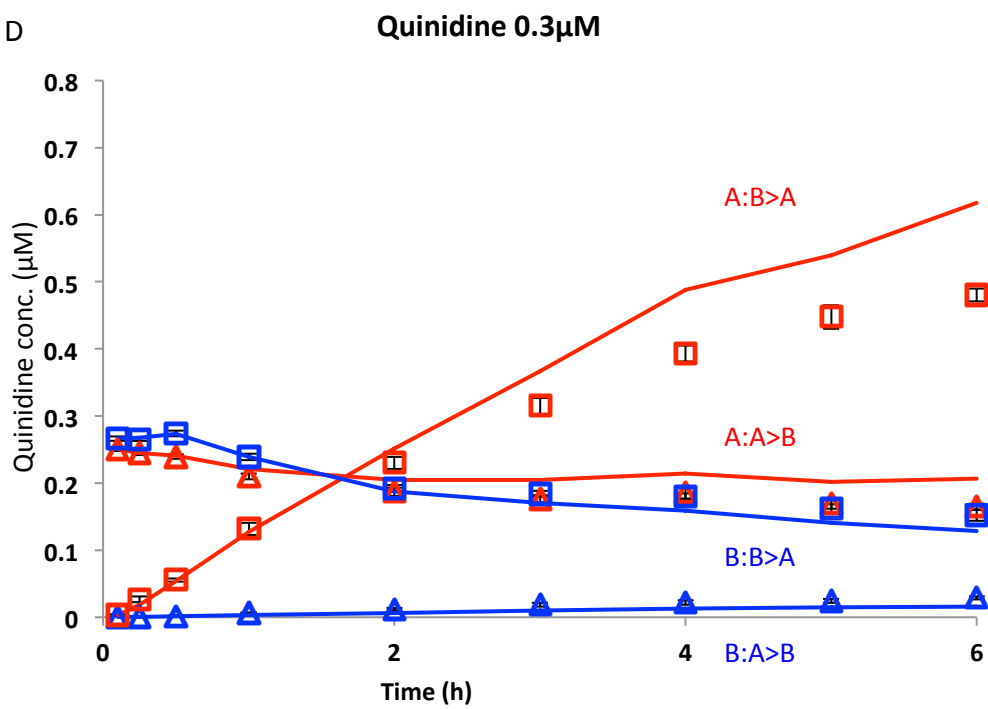

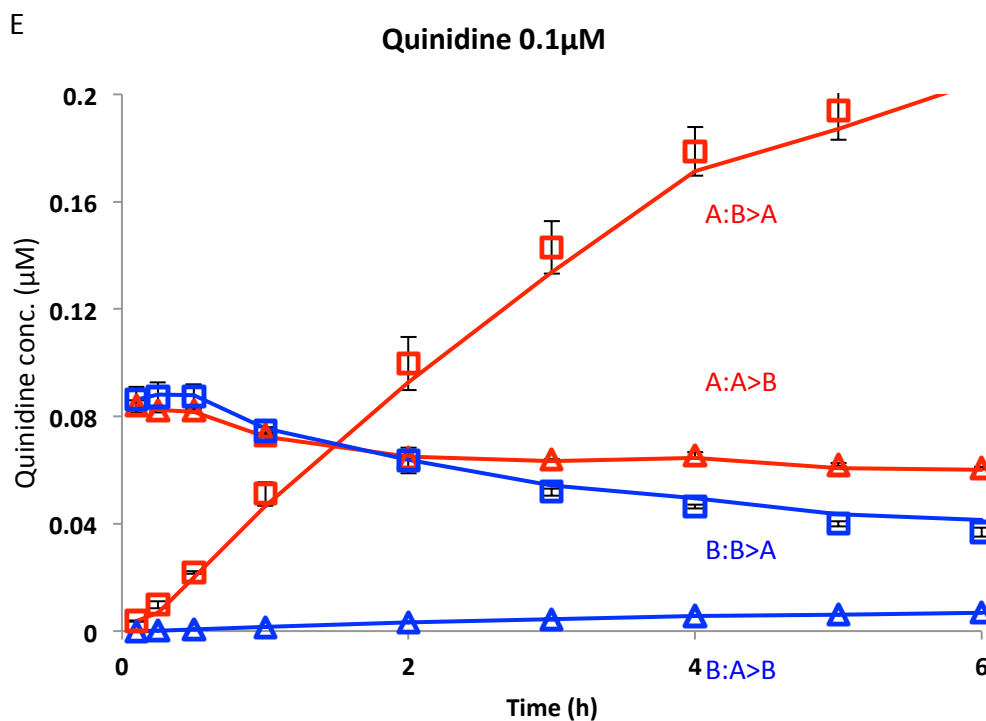

**Supplemental Figure 2:** Transport data of quinidine with initial concentration of 30 $\mu$ M (A), 10 $\mu$ M (B), 1 $\mu$ M (C), 0.3 $\mu$ M (D) and 0.1 $\mu$ M (E) over 6 hours and their fitted curves across Caco-2 cell monolayers. The symbols show the data points with error bars showing the standard deviation of triplicate experimental measurement. The lines show the best fits for drugs assuming there are no other transporters. A:B>A denotes the substrate concentration in the apical chamber when the basolateral chamber is the donor, while B:B>A denotes the substrate concentration remaining in the donor basolateral chamber. The A:B>A transport is high because P-gp actively effluxes drug into the apical chamber. The B:A>B denotes the substrate concentration in the basolateral chamber when apical chamber is the donor, while A:A>B denotes the substrate concentration remaining in the donor apical chamber.



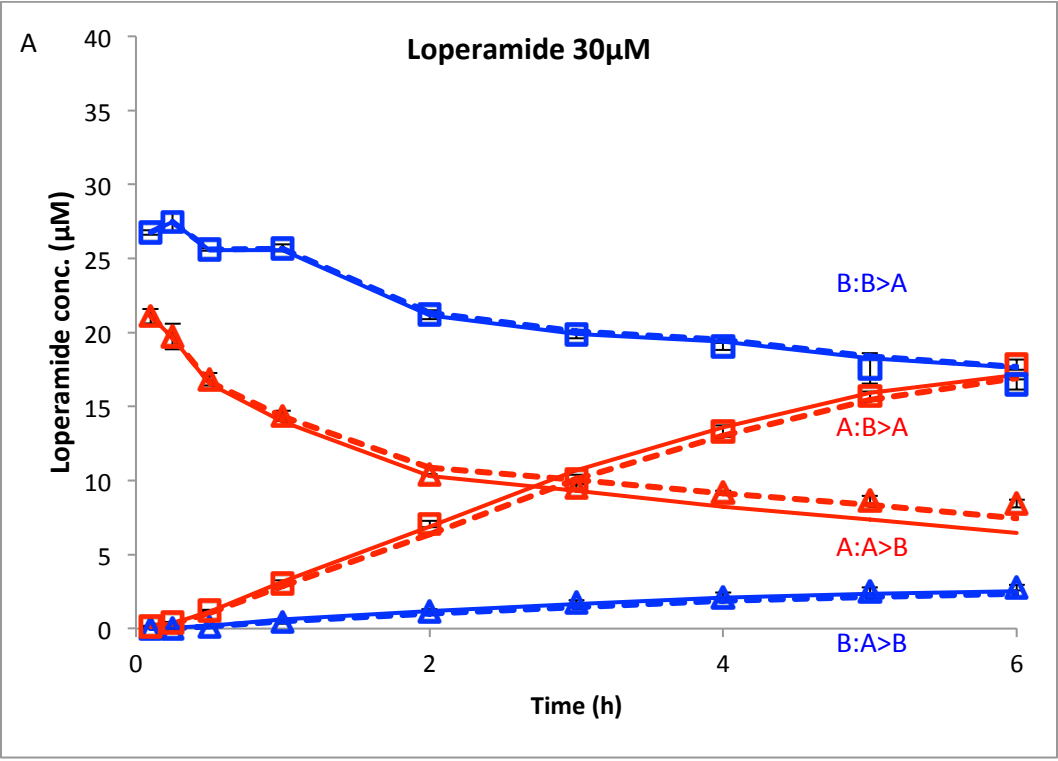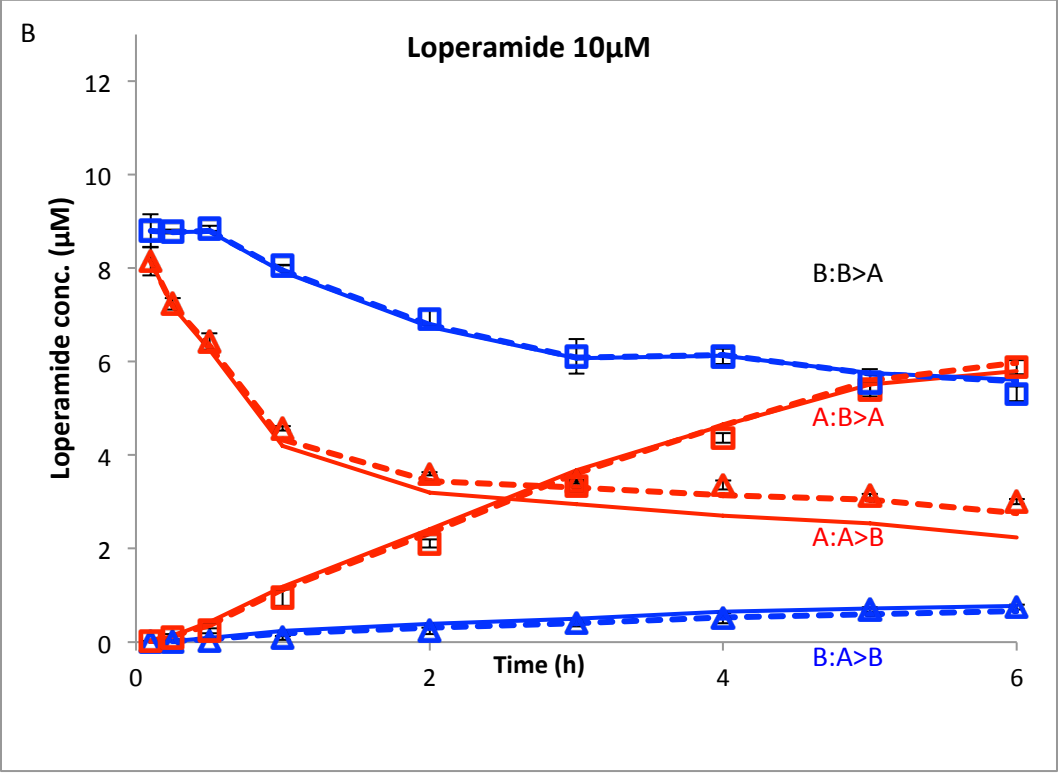

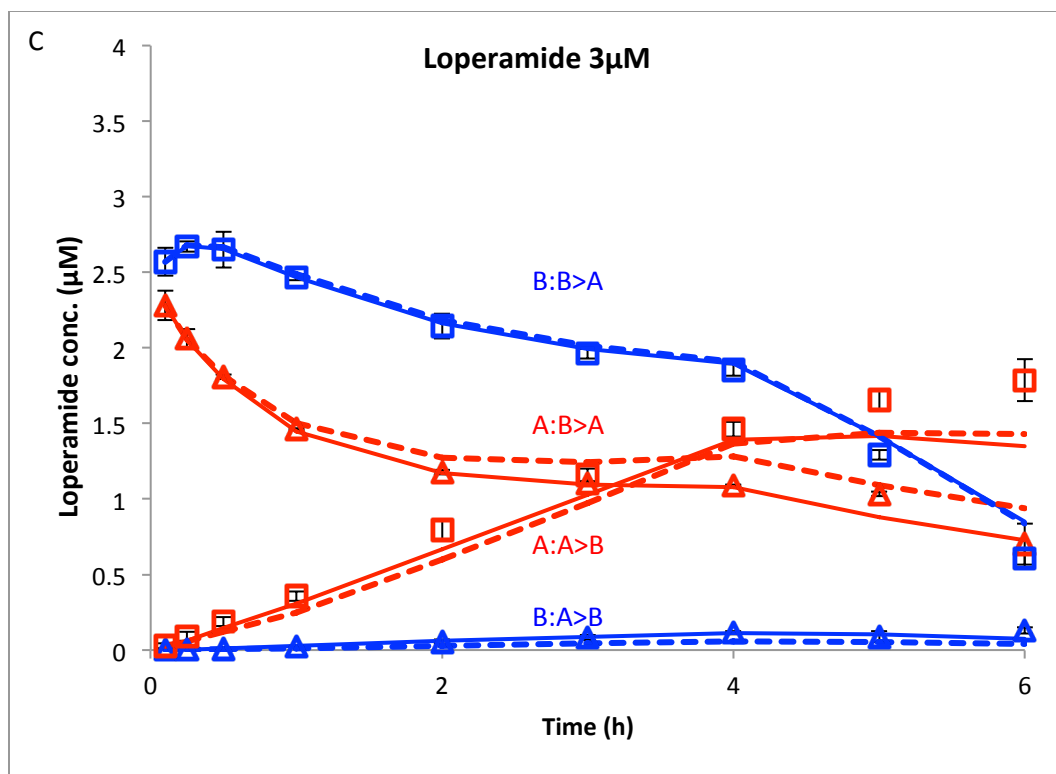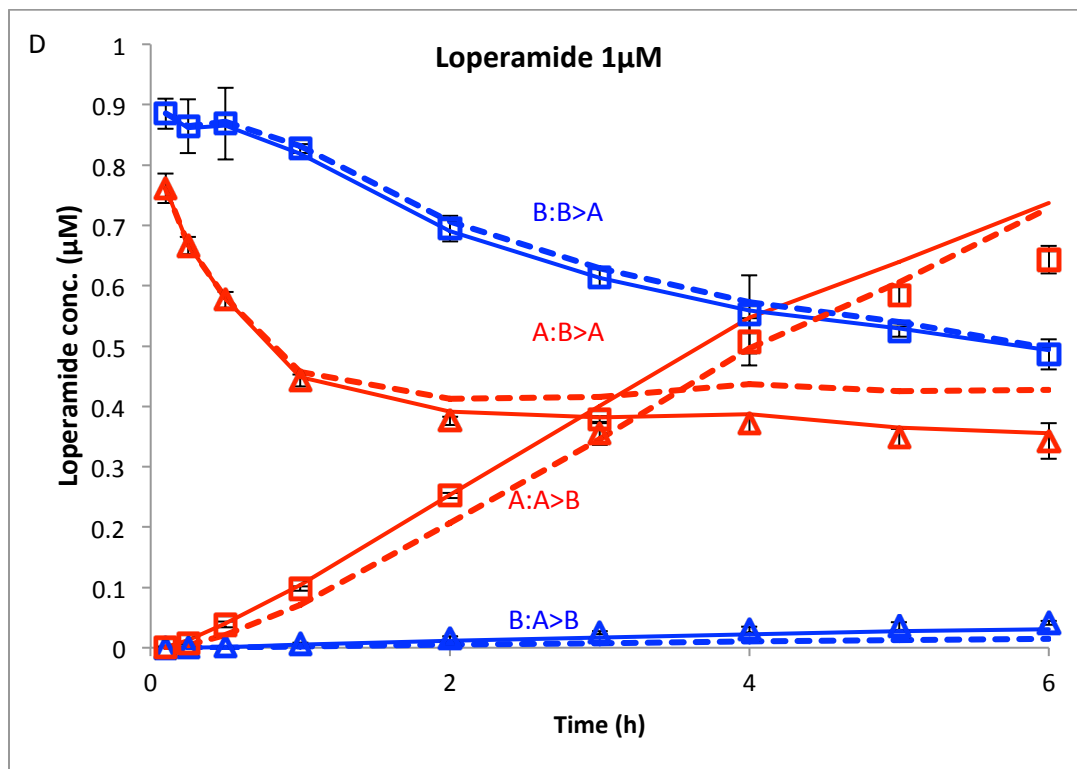

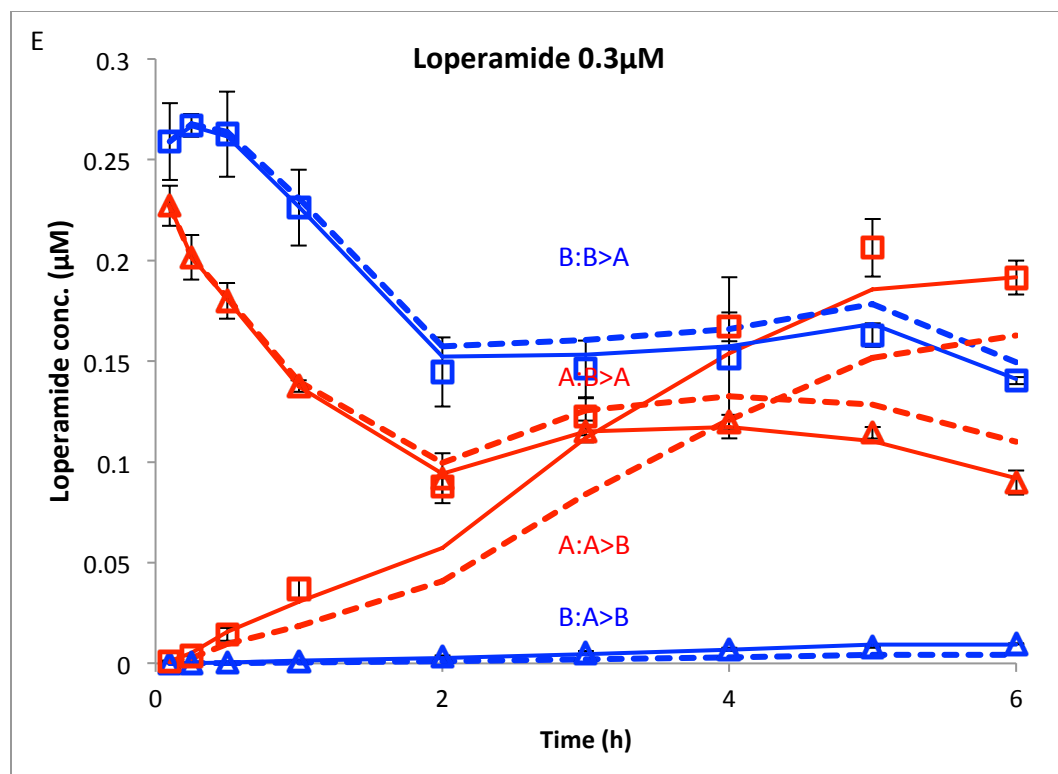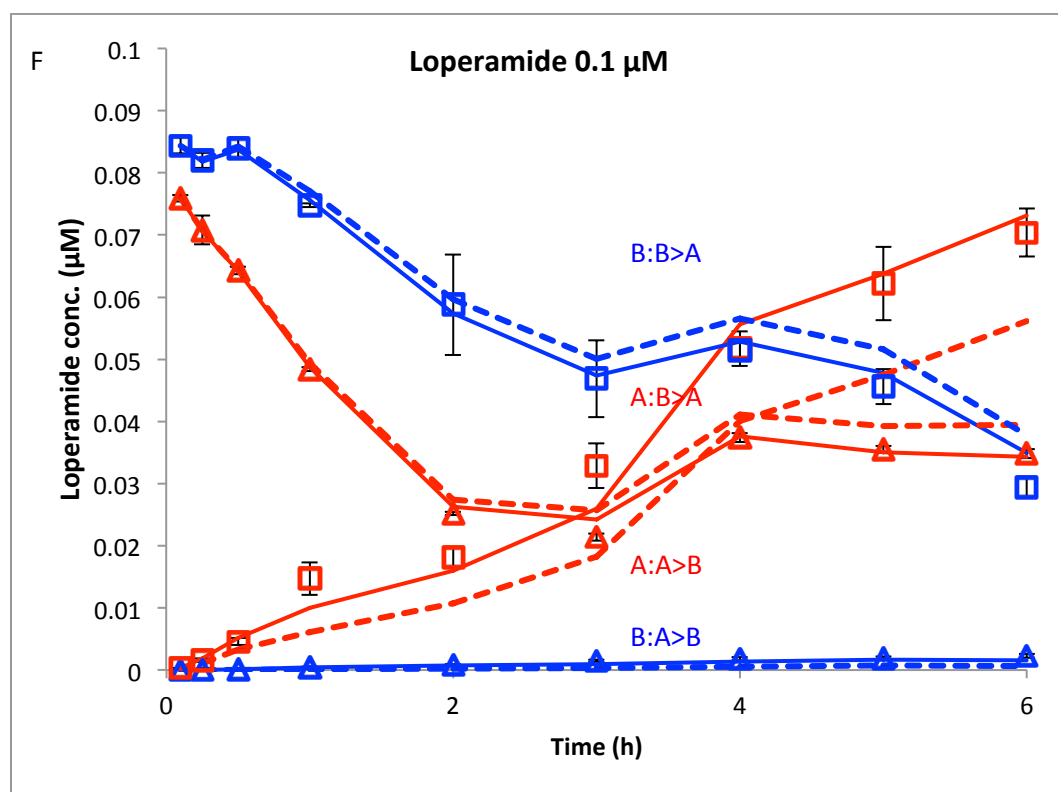

**Supplemental Figure 3:** Loperamide transport data with initial concentrations of 30 $\mu$ M (A), 10 $\mu$ M (B), 3 $\mu$ M (C), 1 $\mu$ M (D), 0.3 $\mu$ M (E) and 0.1  $\mu$ M (F) fitted with and without a basolateral transporter. The symbols show the data points with error bars showing the standard deviation of triplicate measurements. The fits for P-gp alone are shown by a dashed line, whereas the solid line shows the effect of adding a basolateral uptake transporter modeled with first-order clearance. Loperamide shows an underestimate of the data for P-gp alone.

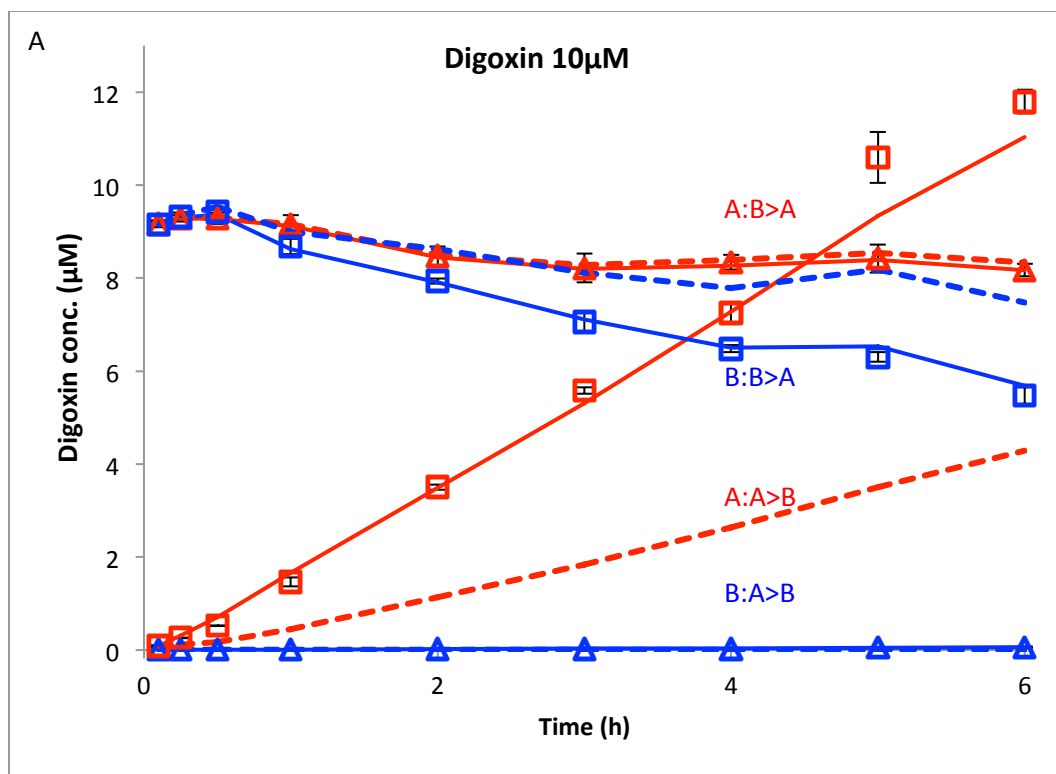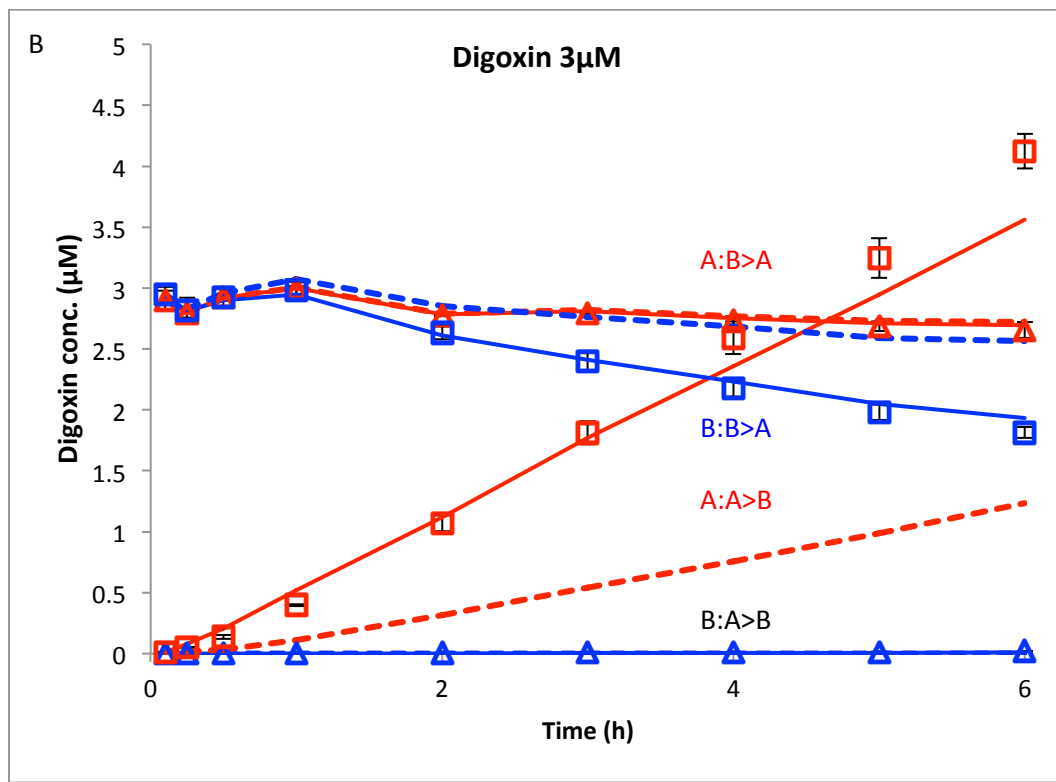

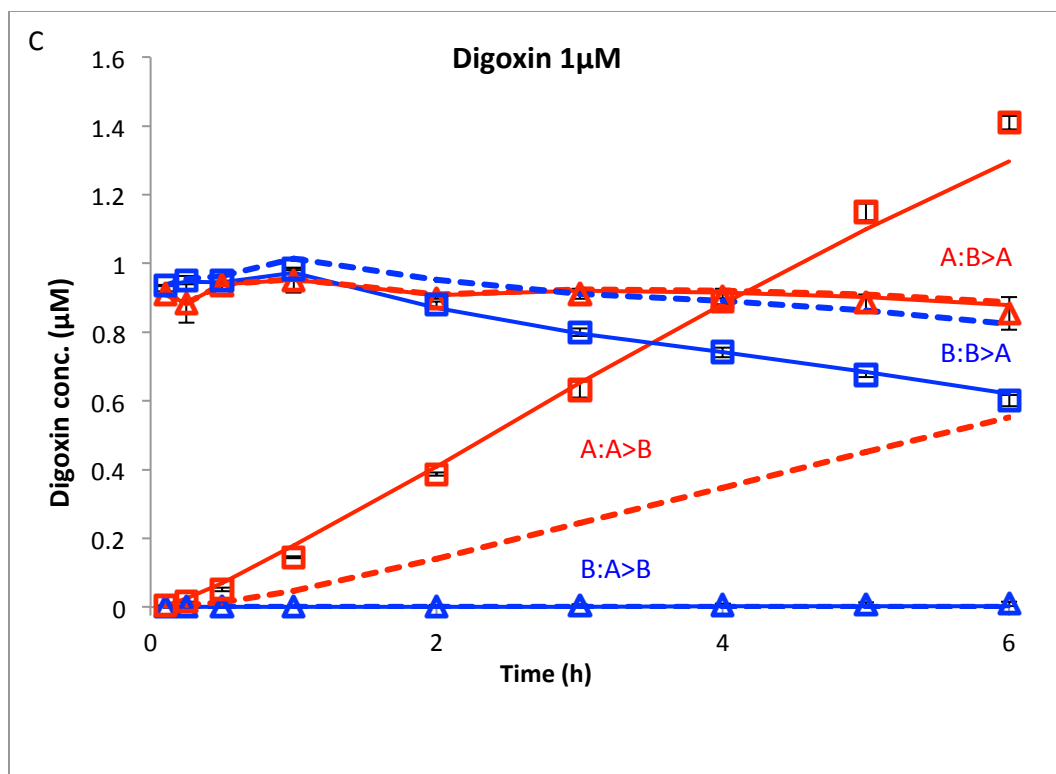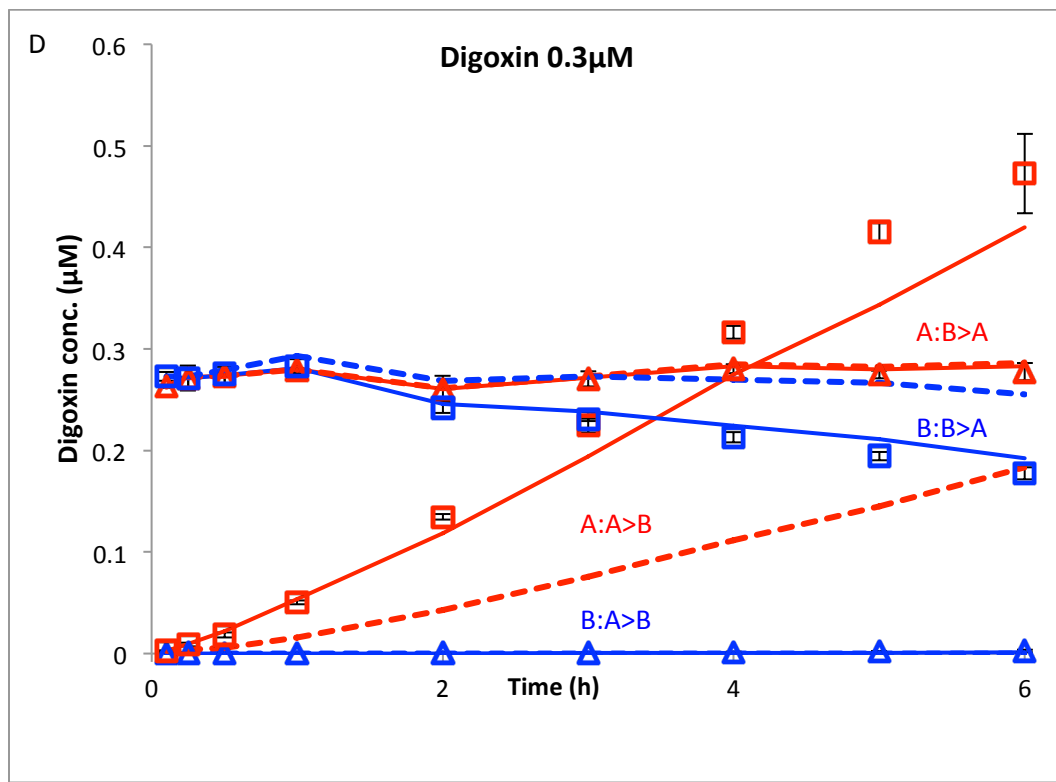

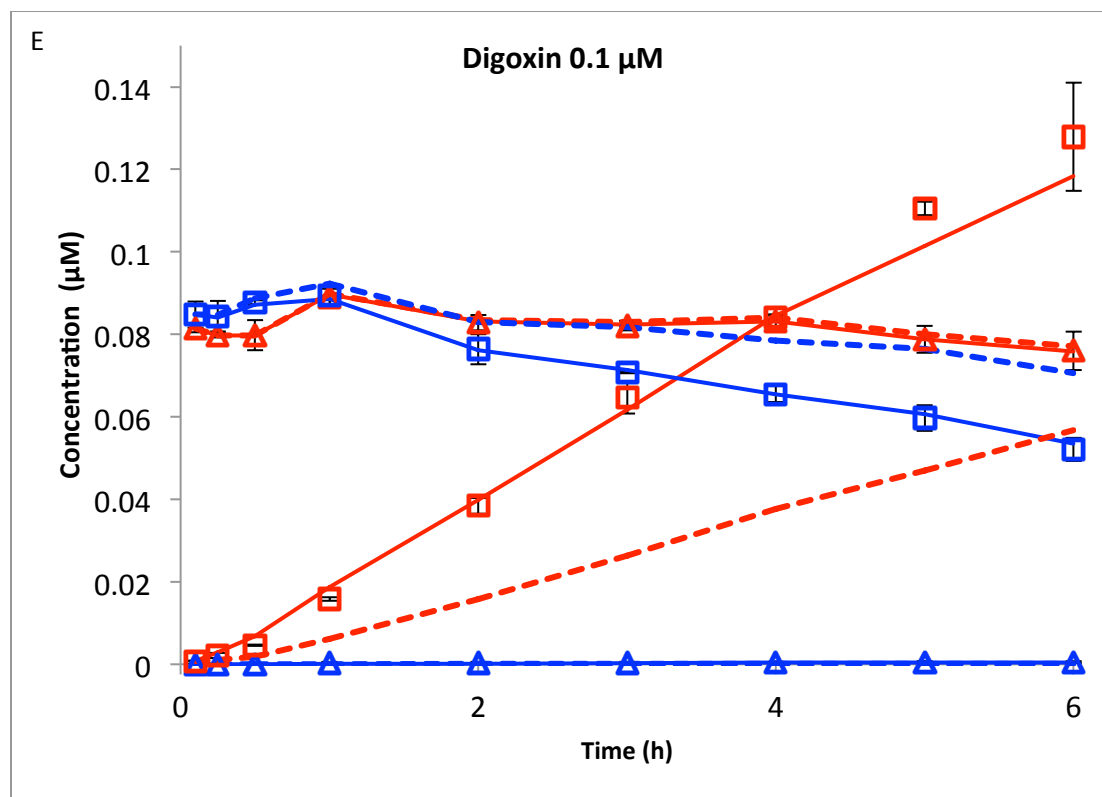

**Supplemental Figure 4:** Digoxin transport data with initial concentrations of 10 $\mu\text{M}$  (A), 3 $\mu\text{M}$  (B), 1 $\mu\text{M}$  (C), 0.3 $\mu\text{M}$  (D) and 0.1 $\mu\text{M}$  (E) fitted with and without a basolateral transporter. The symbols show the data points with error bars showing the standard deviation of triplicate measurements. The fits for P-gp alone are shown by a dashed line, whereas the solid line shows the effect of adding a basolateral uptake transporter modeled with first-order clearance. Digoxin show an underestimate of the data for P-gp alone.
